# Supplementary material for: Phenotypic diversity and temporal variability in a bacterial signaling network revealed by single-cell FRET
Source: eLife journal article supplement (doi:10.7554/elife.27455), 2017-12-12
Supplement: supp [file elife-27455-supp-v1.zip]

Archive with 25 entries (25 files):
- elife_poa_e27455_Figure_4_figure_supplement_2.pdf
- elife_poa_e27455_Figure_5_video_1.avi
- elife_poa_e27455_Figure_2_figure_supplement_1.pdf
- elife_poa_e27455_Figure_3_figure_supplement_3.pdf
- elife_poa_e27455_Figure_1_source_data_1.zip
- elife_poa_e27455_Figure_3_source_data_1.zip
- elife_poa_e27455_Figure_3_figure_supplement_2.pdf
- elife_poa_e27455_Figure_5_figure_supplement_2.pdf
- elife_poa_e27455_Figure_2_source_data_1.zip
- elife_poa_e27455_Figure_4_Figure_Supplement_3.pdf
- elife_poa_e27455_Source_code_file_2_CheB_sublinear_kinetics_model_(Mathematica).nb
- elife_poa_e27455_Figure_5_source_data_1.zip
- elife_poa_e27455_Figure_2_figure_supplement_2.pdf
- elife_poa_e27455_Figure_3_figure_supplement_4.pdf
- elife_poa_e27455_Figure_3_figure_supplement_5.pdf
- elife_poa_e27455_Figure_3_figure_supplement_1.pdf
- elife_poa_e27455_Figure_4_source_data_1.zip
- elife_poa_e27455_Figure_2_figure_supplement_3.pdf
- elife_poa_e27455_Figure_1_figure_supplement_1.pdf
- elife_poa_e27455_Figure_5_figure_supplement_1.pdf
- elife_poa_e27455_Figure_4_figure_supplement_1.pdf
- elife_poa_e27455_Source_code_file_1_Image_segmentation_source_code.py
- elife_poa_e27455_Figure_1_figure_supplement_3.pdf
- elife_poa_e27455_Transparent_Reporting_File.pdf
- elife_poa_e27455_Figure_1_figure_supplement_2.pdf
