# Supplementary figures and images for: Phenotypic diversity and temporal variability in a bacterial signaling network revealed by single-cell FRET
Source: eLife journal article supplement (doi:10.7554/elife.27455), 2017-12-12

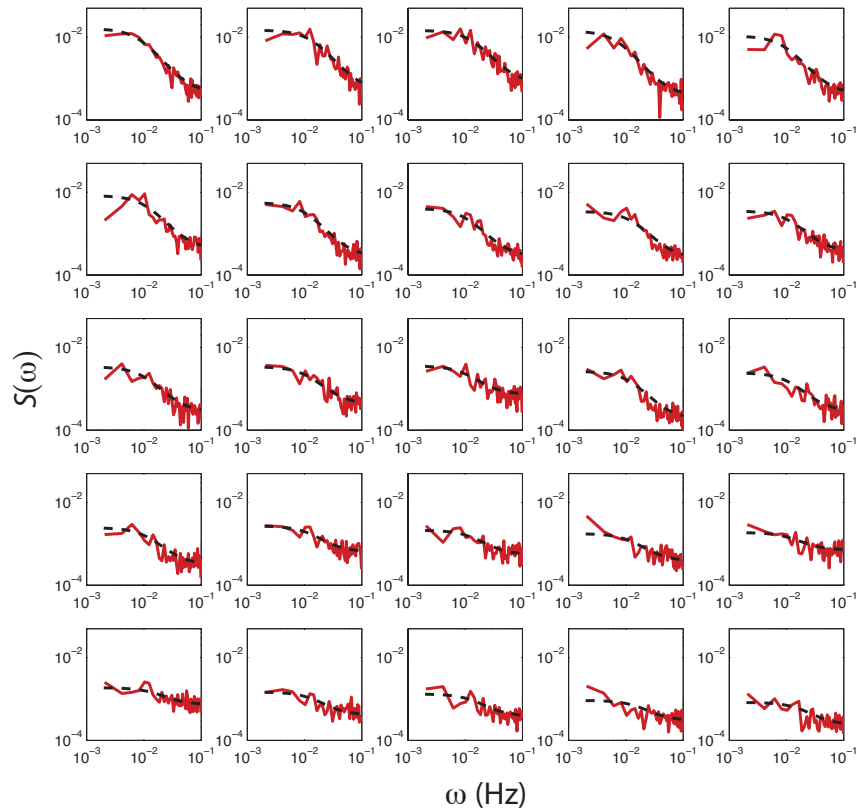

Supplement: supp [file elife-27455-supp-v1.zip › elife_poa_e27455_Figure_4_figure_supplement_2.pdf]

**a**

activity

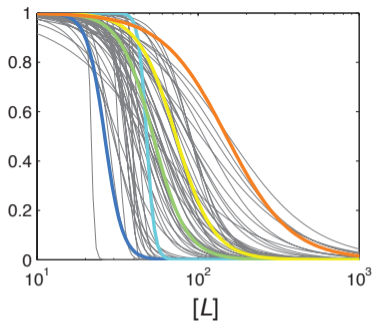**b** $H$ 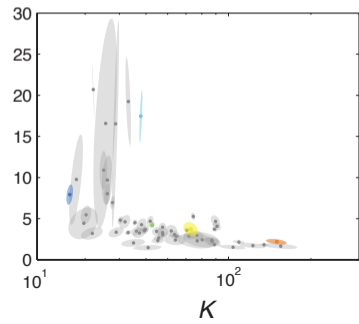**c** $p(K)$ 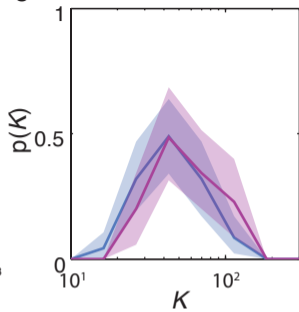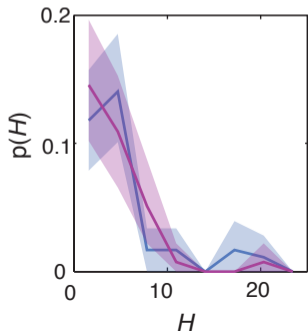

Supplement: supp [file elife-27455-supp-v1.zip › elife_poa_e27455_Figure_2_figure_supplement_1.pdf]

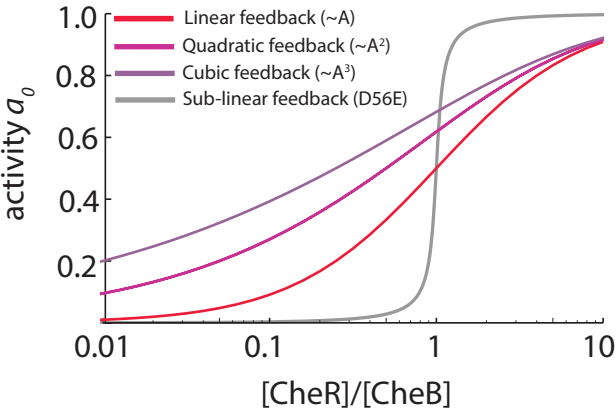

Supplement: supp [file elife-27455-supp-v1.zip › elife_poa_e27455_Figure_3_figure_supplement_3.pdf]

**a**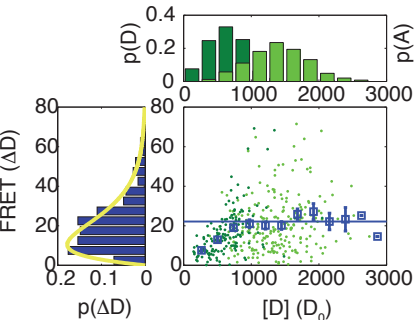**b**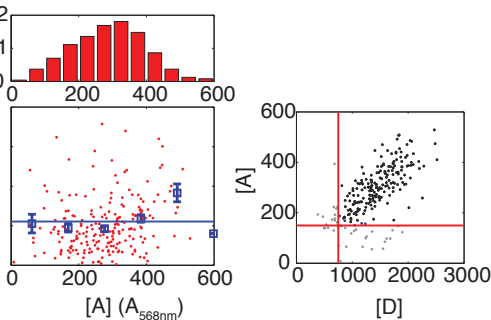

Supplement: supp [file elife-27455-supp-v1.zip › elife_poa_e27455_Figure_3_figure_supplement_2.pdf]

pdf

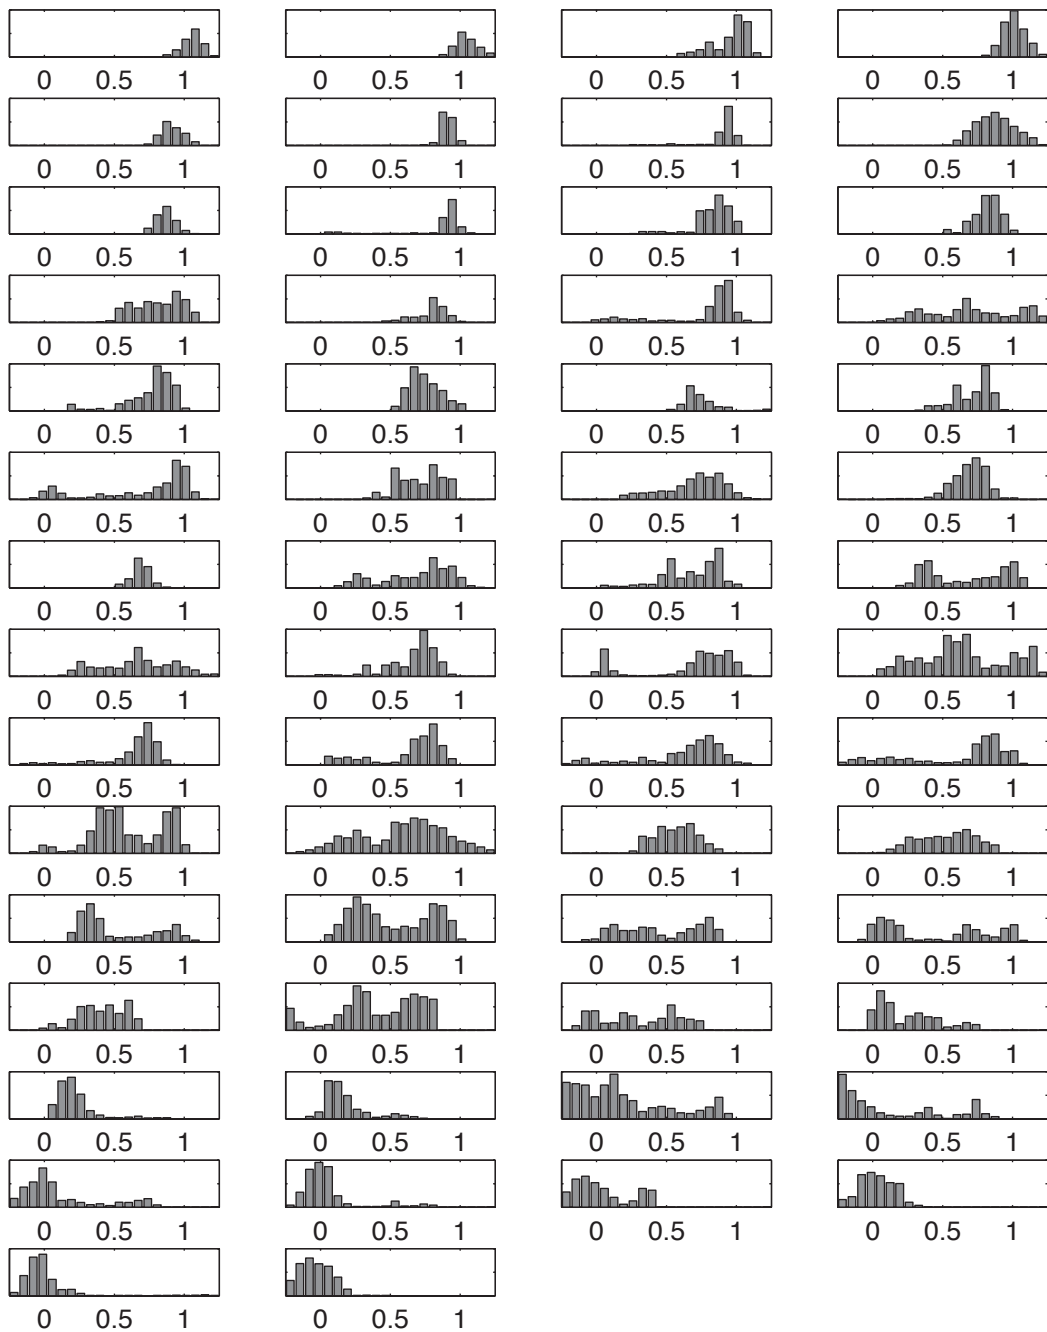Activity  $a(t)$

Supplement: supp [file elife-27455-supp-v1.zip › elife_poa_e27455_Figure_5_figure_supplement_2.pdf]

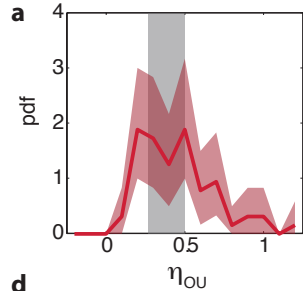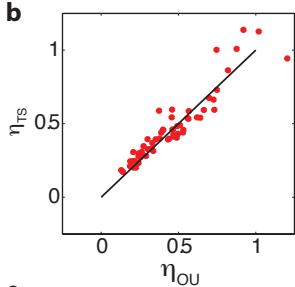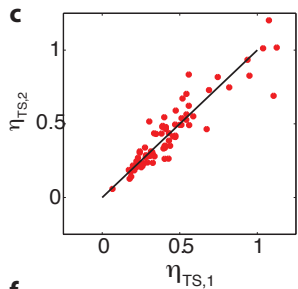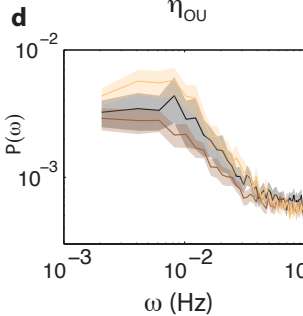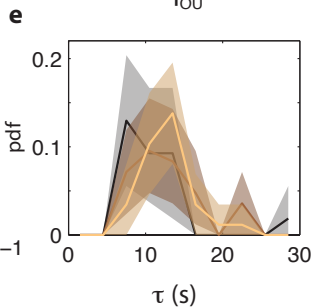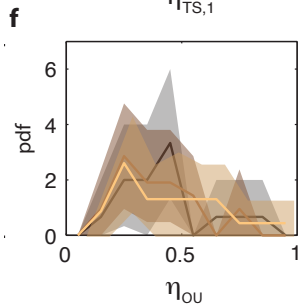

Supplement: supp [file elife-27455-supp-v1.zip › elife_poa_e27455_Figure_4_Figure_Supplement_3.pdf]

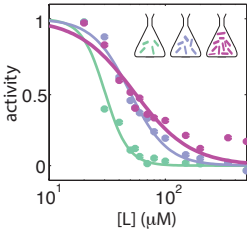

Supplement: supp [file elife-27455-supp-v1.zip › elife_poa_e27455_Figure_2_figure_supplement_2.pdf]

activity (norm.)

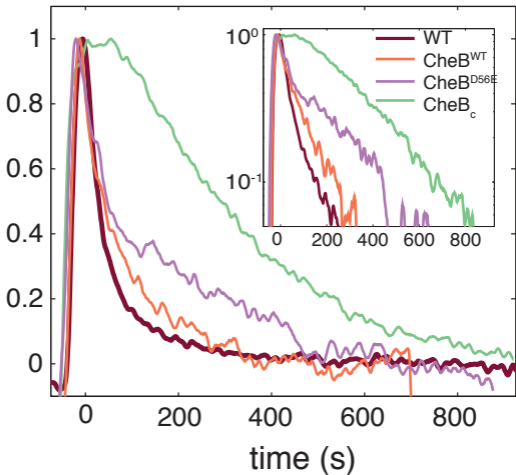

Supplement: supp [file elife-27455-supp-v1.zip › elife_poa_e27455_Figure_3_figure_supplement_4.pdf]

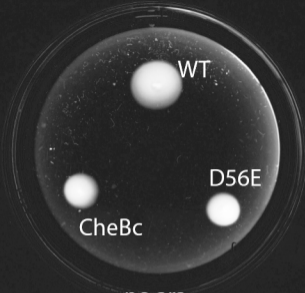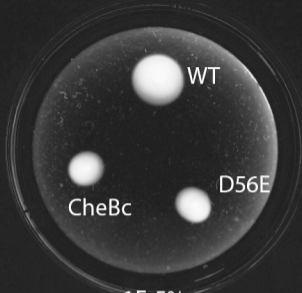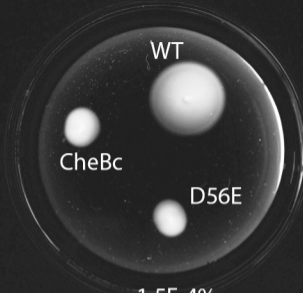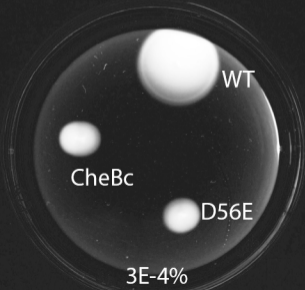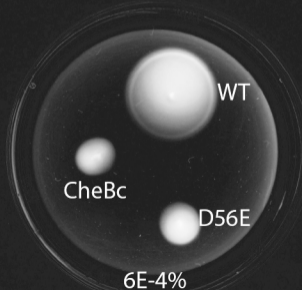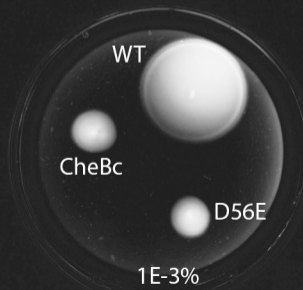

Supplement: supp [file elife-27455-supp-v1.zip › elife_poa_e27455_Figure_3_figure_supplement_5.pdf]

**a**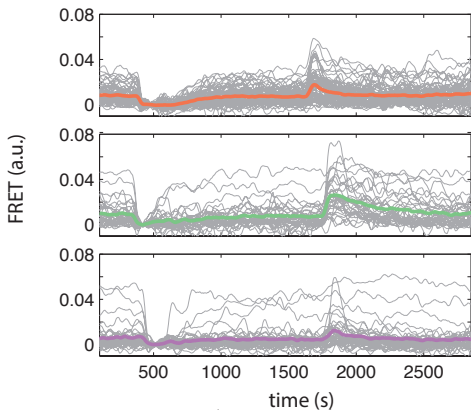**b**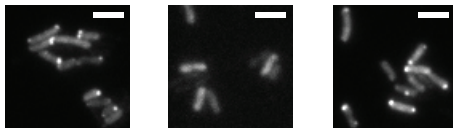**c**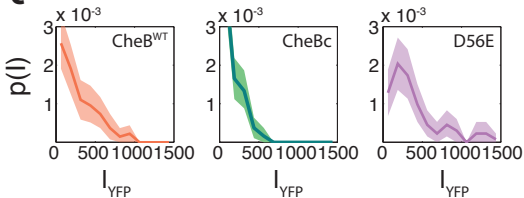

Supplement: supp [file elife-27455-supp-v1.zip › elife_poa_e27455_Figure_3_figure_supplement_1.pdf]

**a**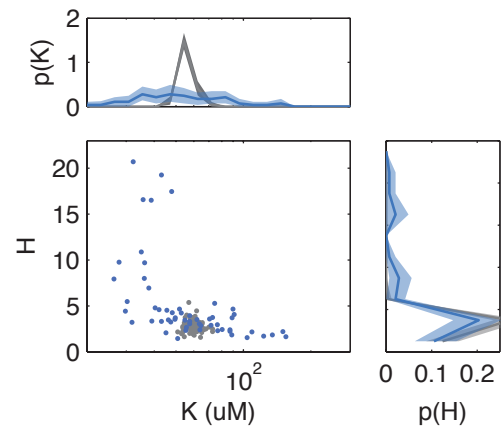**b**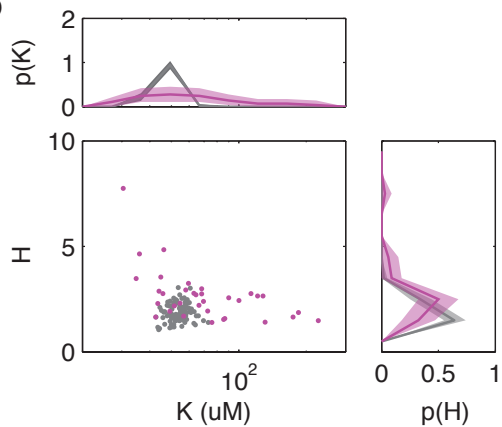**c**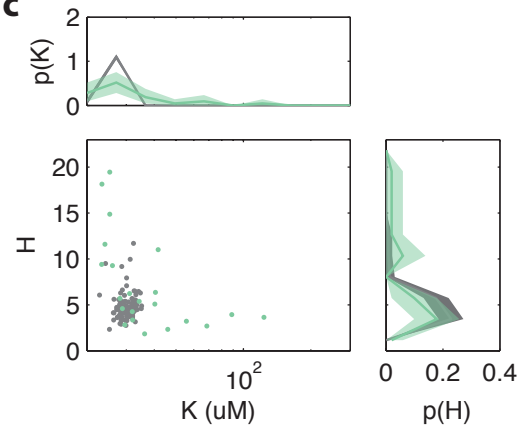**d**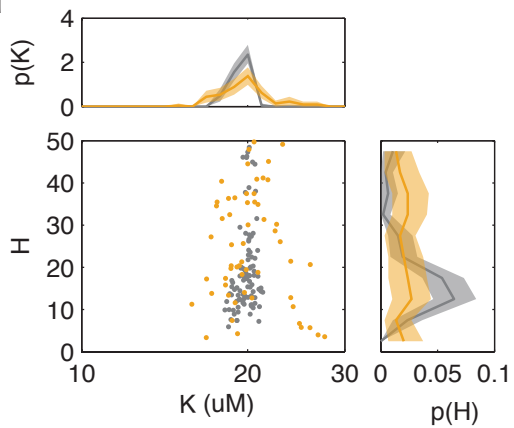

Supplement: supp [file elife-27455-supp-v1.zip › elife_poa_e27455_Figure_2_figure_supplement_3.pdf]

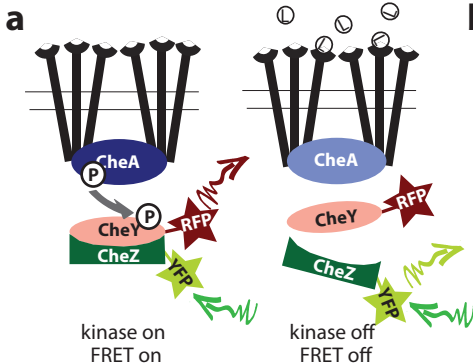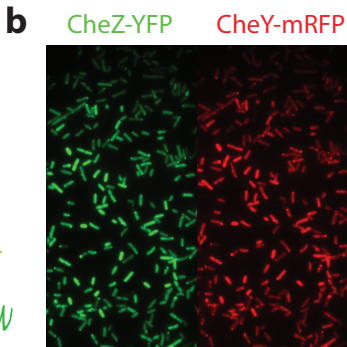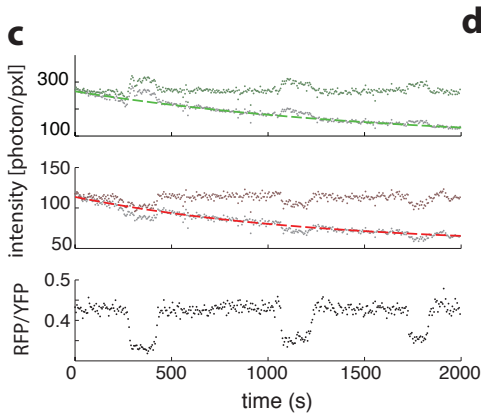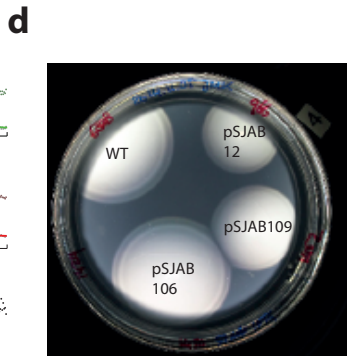

Supplement: supp [file elife-27455-supp-v1.zip › elife_poa_e27455_Figure_1_figure_supplement_1.pdf]

Activity  $a(t)$

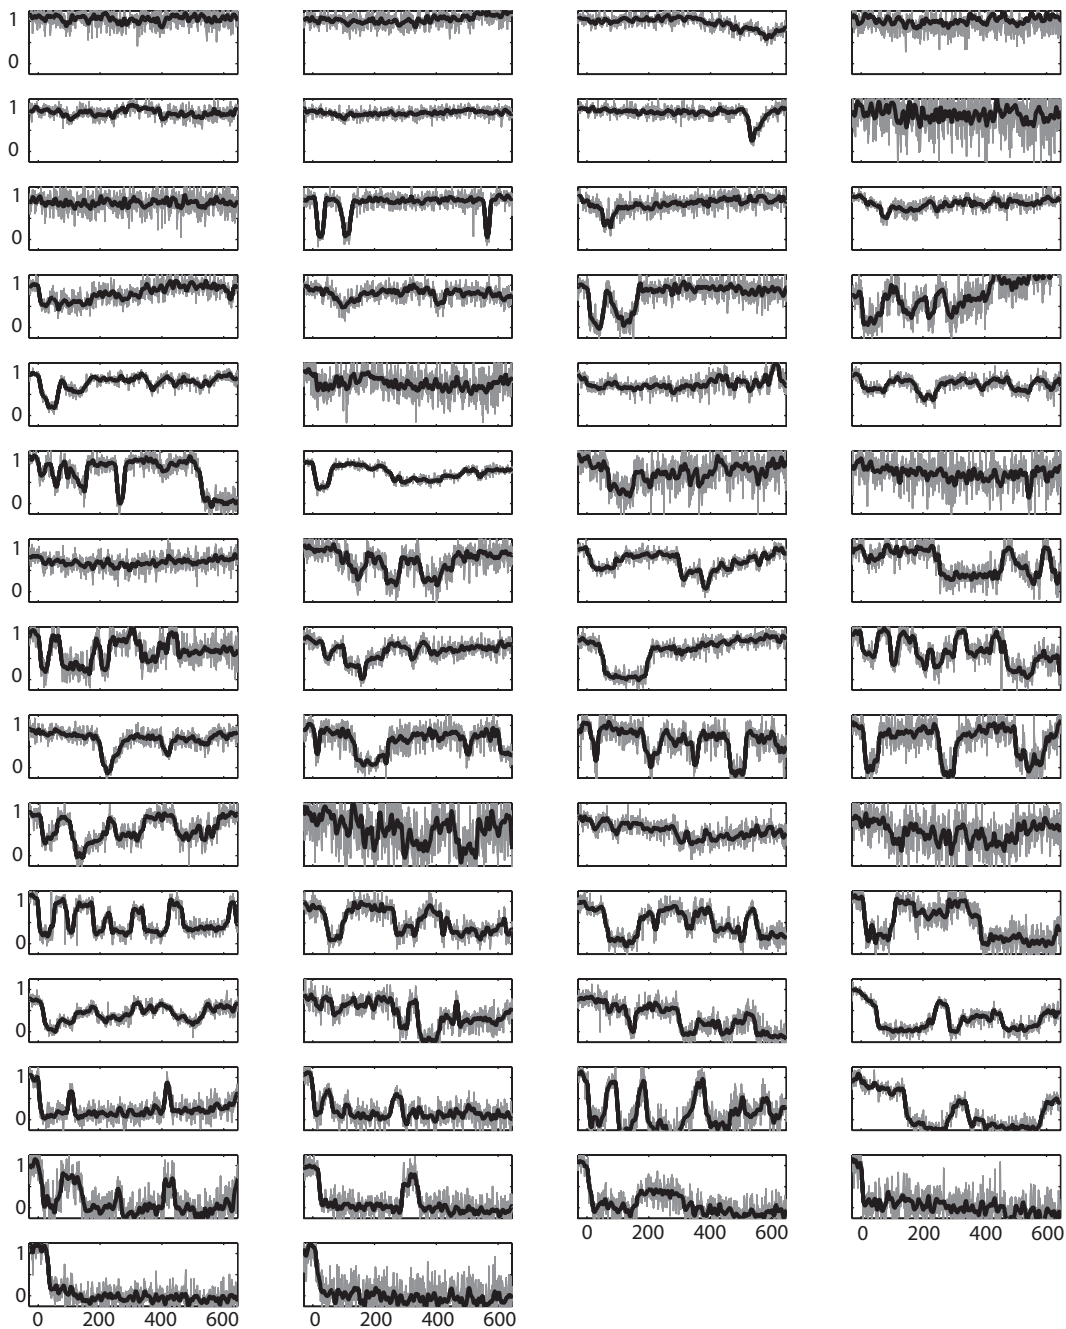

time(s)

Supplement: supp [file elife-27455-supp-v1.zip › elife_poa_e27455_Figure_5_figure_supplement_1.pdf]

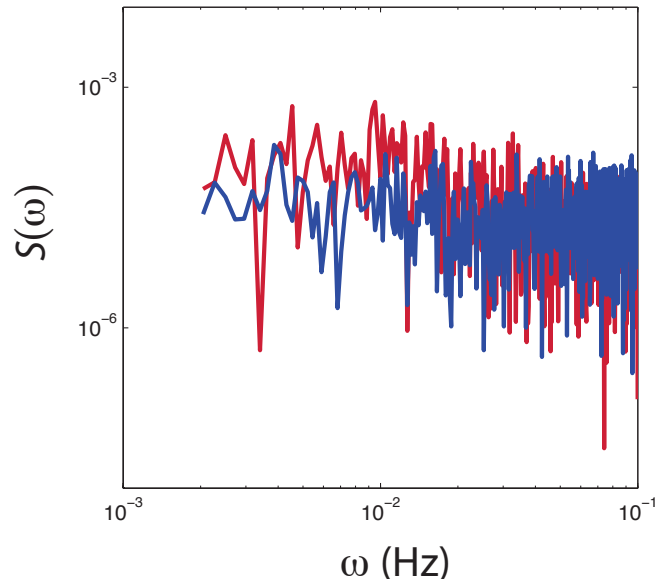

Supplement: supp [file elife-27455-supp-v1.zip › elife_poa_e27455_Figure_4_figure_supplement_1.pdf]

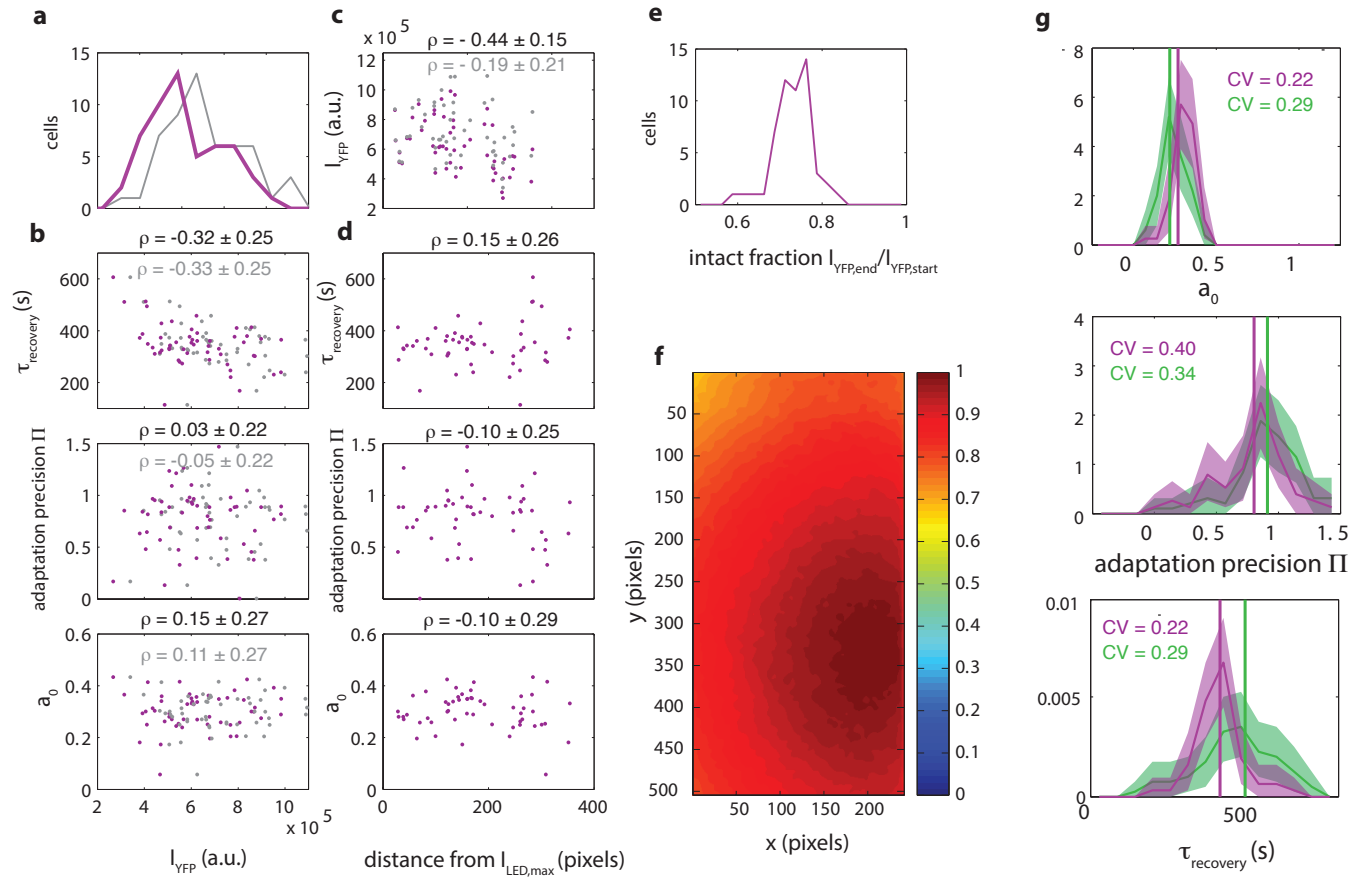

Supplement: supp [file elife-27455-supp-v1.zip › elife_poa_e27455_Figure_1_figure_supplement_3.pdf]

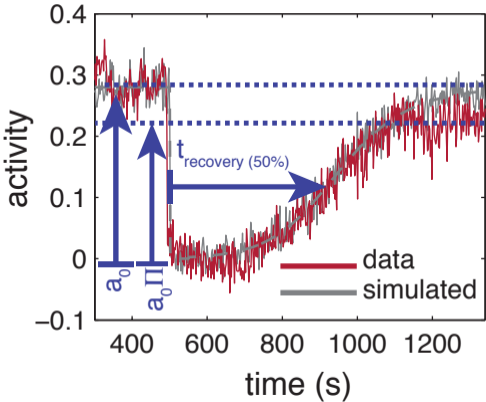

Supplement: supp [file elife-27455-supp-v1.zip › elife_poa_e27455_Figure_1_figure_supplement_2.pdf]
